# Supplementary material
Source: bioRxiv or medRxiv preprint supplement (https://www.biorxiv.org/highwire/filestream/18574/field_highwire_adjunct_files/0/066399-1.pdf)

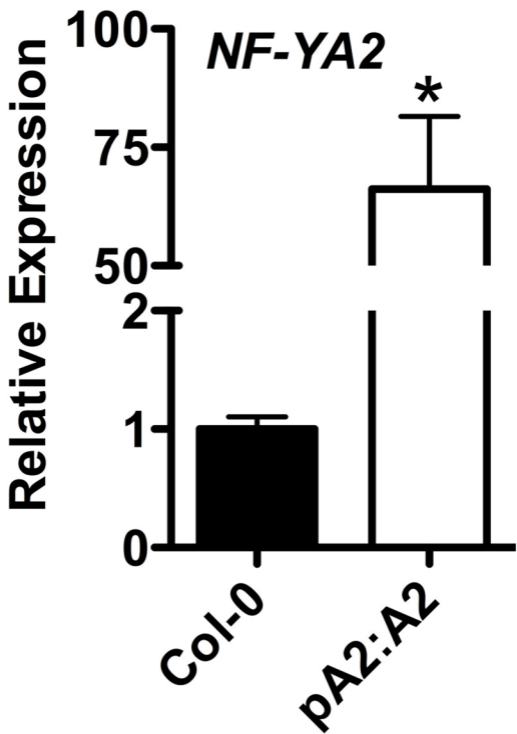

Supplement: Supplementary file [file 066399-1.pdf]
